# Supplementary figures and images for: The First Year: Understanding Newcomer Adolescents' Academic Transition
Source: MDPI journal article supplement (doi:10.3390/ijms23010560), 2014-01-01

# 20 nucleotides deletion

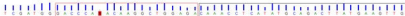

## Wild-type SDHB sequence

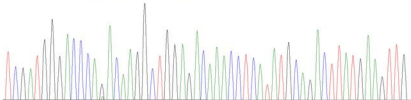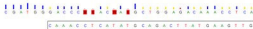

## Mutated SDHB sequence

c.142\_161del

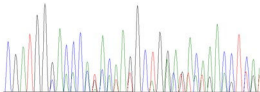

Supplement: s1 [file s1]

A

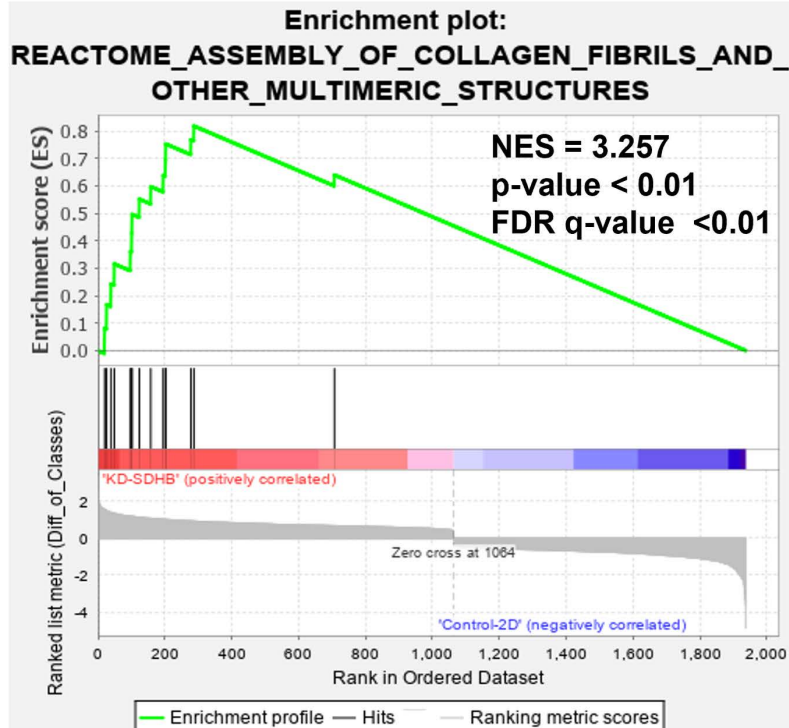

B

KD-SDHB hPeo1

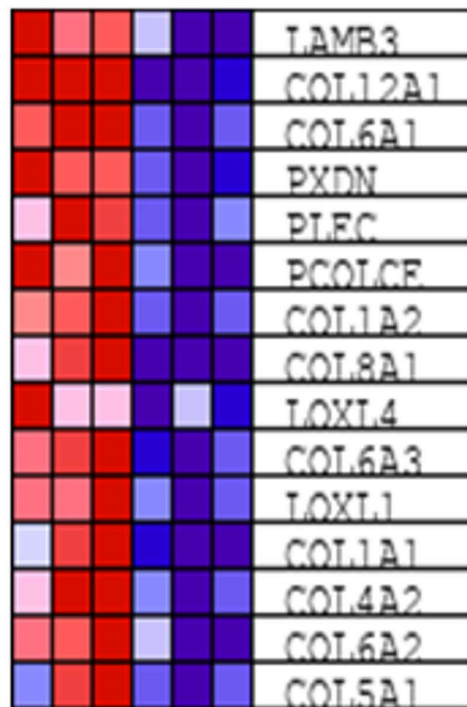

Supplement: s1 [file s1]

**hPheo1**

**KD-SDHB**

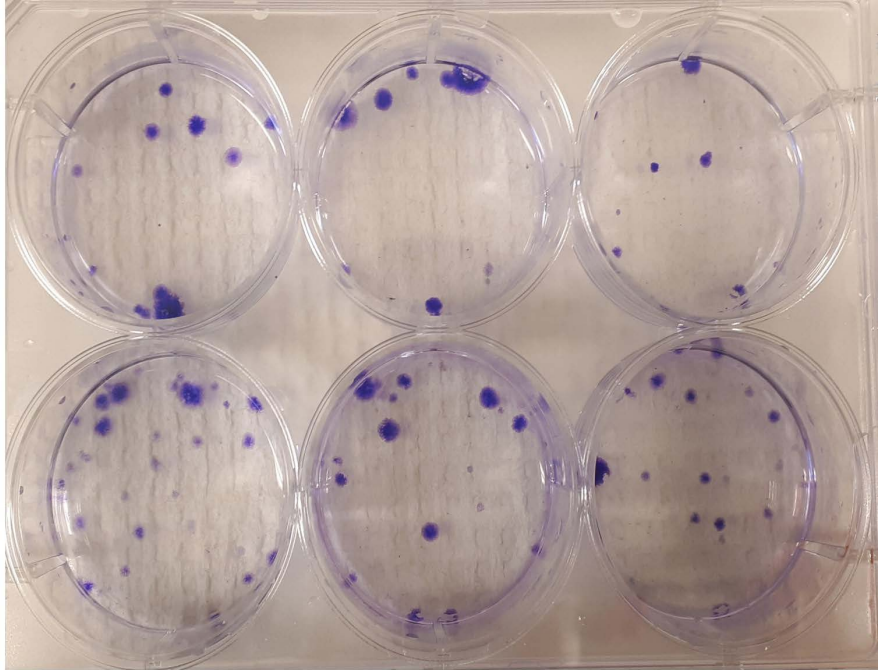

Seeding density= 100 cells/well

Duration: 2 weeks

Survival fraction= 2.78%

Supplement: s1 [file s1]

# GLUD1

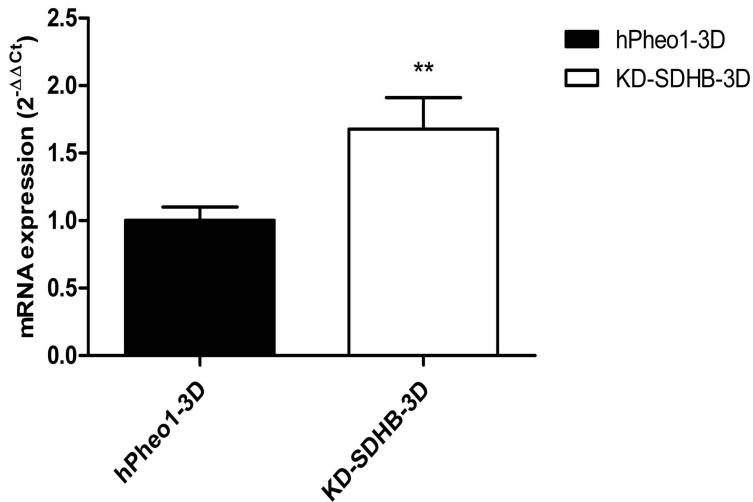

Supplement: s1 [file s1]

**A**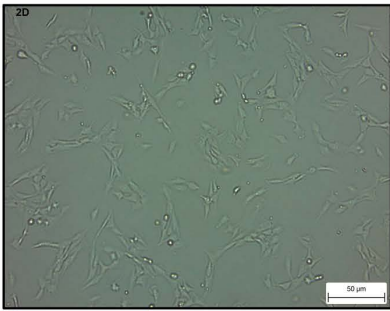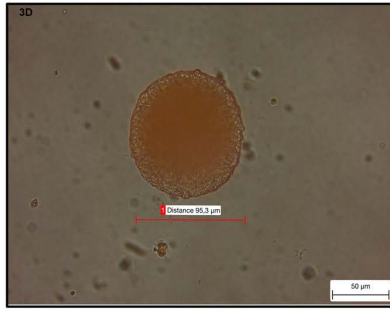**B**

Hallmark gene sets "3D culture"

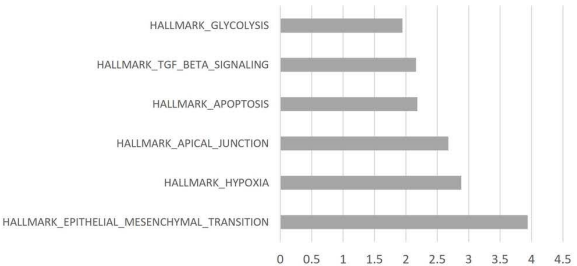

Canonical pathways "3D culture"

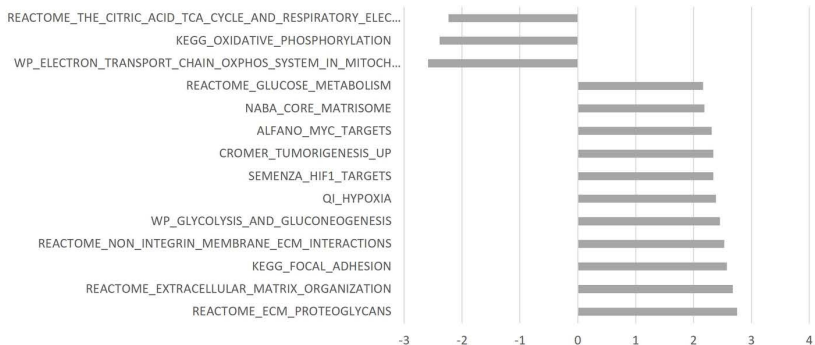

Supplement: s1 [file s1]
